# Supplementary material for: Reversal of neurosteroid effects at α4β2δ GABAA receptors triggers anxiety at puberty
Source: Springer Nature journal article supplement (doi:10.1038/nn1868), 2007-03-11
Supplement: nn1868-S3.pdf [file nn1868-S3.pdf]

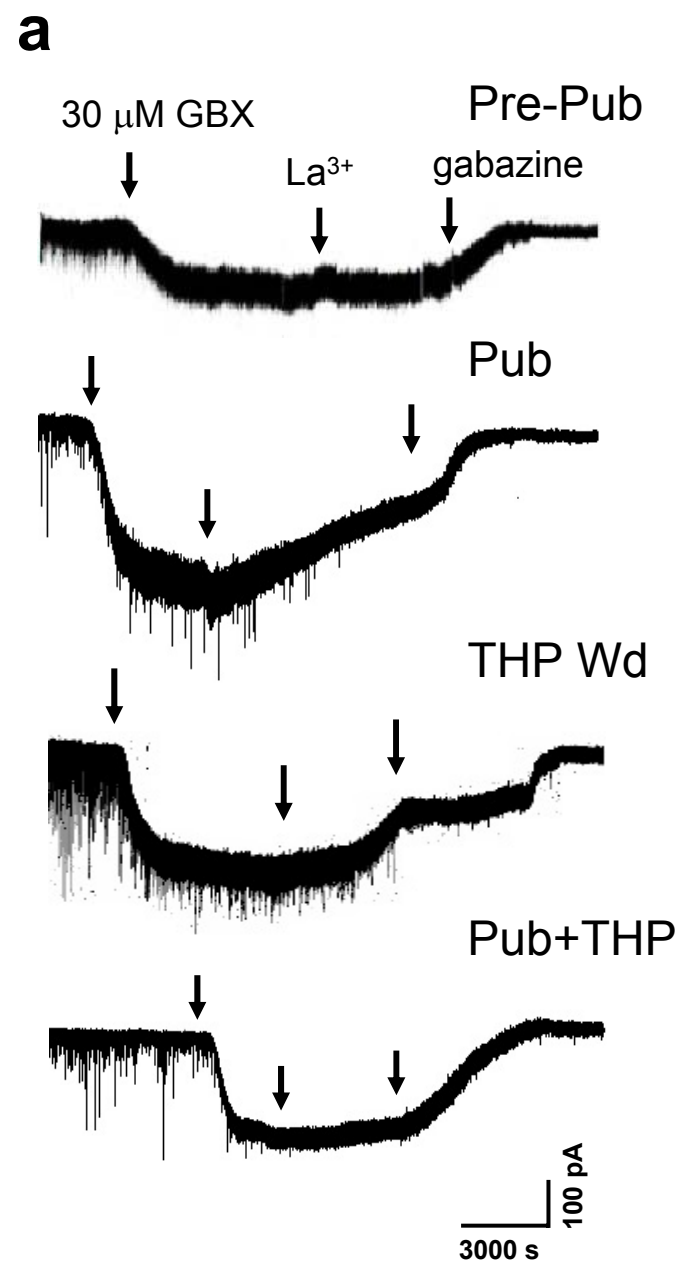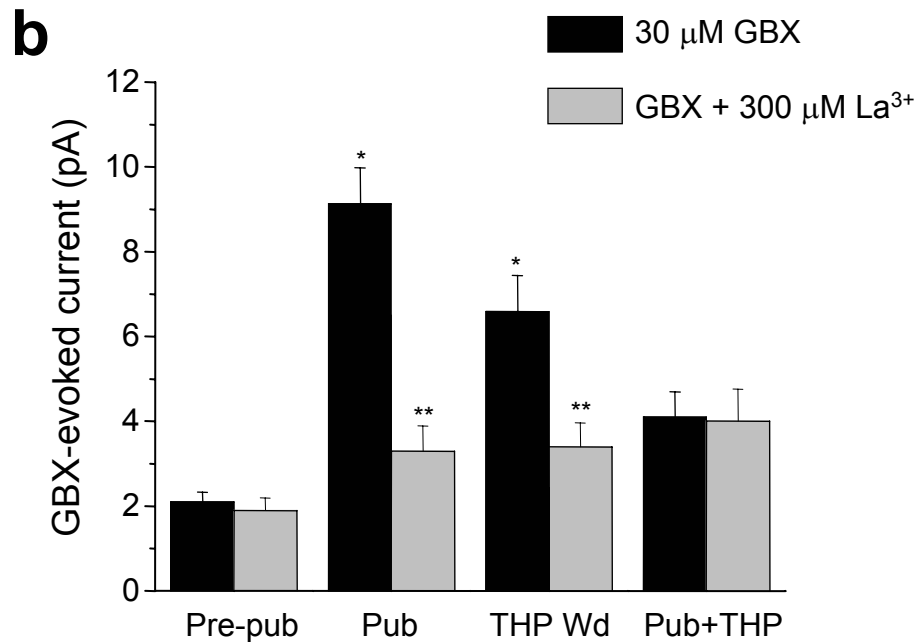

**Supplementary Fig. 3. Pharmacological changes in the tonic inhibitory current of CA1 hippocampus are consistent with increased expression of  $\alpha 4\beta\delta$  receptors after the onset of puberty.** (a) The tonic GABAergic current was recorded from the soma of pyramidal cells in CA1 hippocampus with whole cell patch clamp techniques (see Methods) at a holding potential of  $-50$  mV. Because  $\alpha 4\beta\delta$ -containing receptors have an increased sensitivity to the GABA agonist gaboxadol (GBX)<sup>16</sup>, but are uniquely inhibited by lanthanum ( $La^{3+}$ )<sup>16,17</sup>, the  $La^{3+}$ -sensitive GBX-induced current was assessed in slices from mice after THP Wd or the onset of puberty when  $\alpha 4$  and  $\delta$  subunit expression are increased (Fig. 3). To this end, current generated by  $30$   $\mu$ M GBX was assessed as the deflection in the holding current before and after bath application of  $300$   $\mu$ M  $La^{3+}$  as we have described. GBX generated a significantly larger current after puberty (Pub) or after THP Wd than in slices from pre-pubertal (Pre-pub) mice, and this current was reduced  $50 - 70\%$  by  $La^{3+}$ . The profile in pubertal mice treated with replacement THP was similar to that in pre-pubertal mice, suggesting that changes occurring after the onset of puberty are due to a withdrawal from THP. (a) Representative traces; (b) Mean  $\pm$  SEM.  $n = 5 - 6$  cells for each group. \* $P < 0.05$  vs. Pre-pubertal values, \*\* $P < 0.05$  vs. GBX alone. GBX, gaboxadol
