# Supplementary material for: Reversal of neurosteroid effects at α4β2δ GABAA receptors triggers anxiety at puberty
Source: Springer Nature journal article supplement (doi:10.1038/nn1868), 2007-03-11
Supplement: nn1868-S4.pdf [file nn1868-S4.pdf]

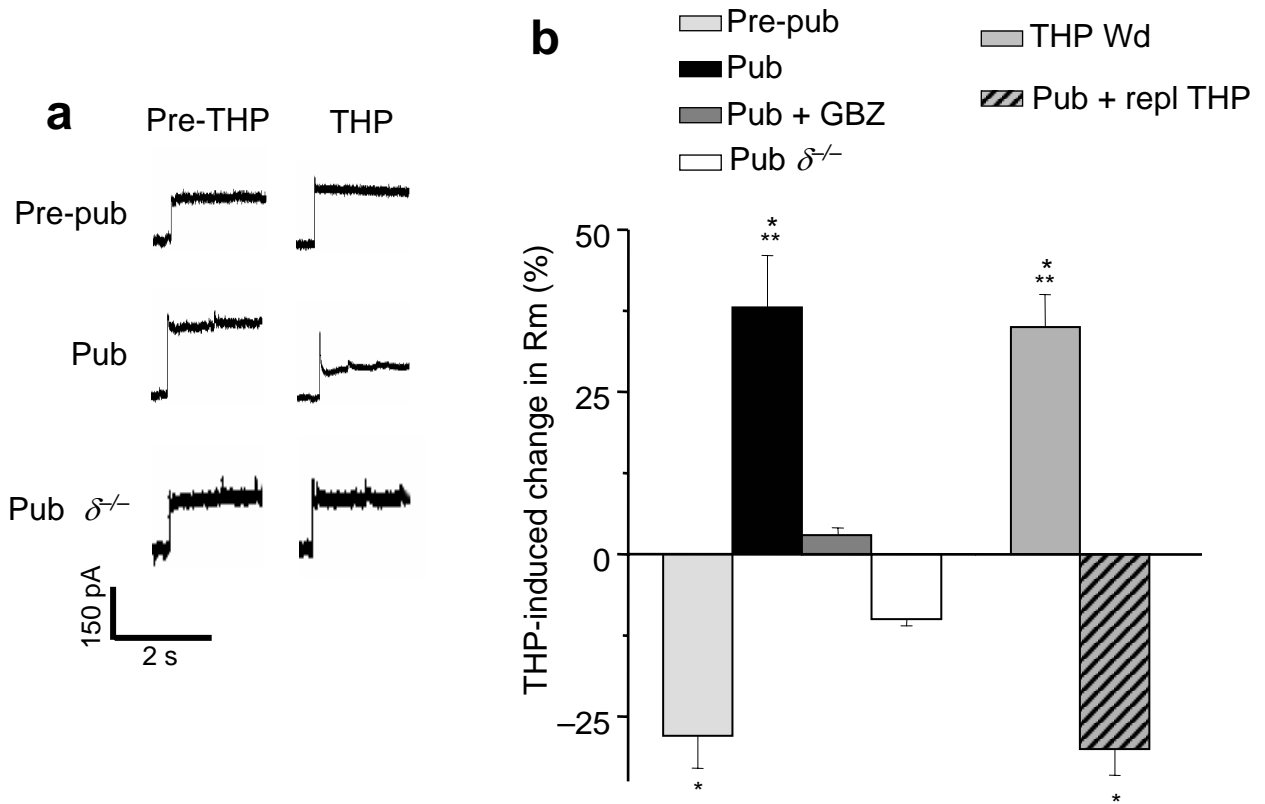

**Supplementary Fig. 4. THP increases the input resistance of hippocampal pyramidal cells at the onset of puberty.** (a) Current response to a 10 mV step ( $-50$  to  $-40$  mV), recorded from the soma with whole cell voltage clamp techniques before and after 30 nM THP in slices from pre-pubertal (Pre-pub) or pubertal (Pub) wild-type or  $\delta^{-/-}$  mice. (b) Mean  $\pm$  SEM. THP increased the input resistance ( $R_m$ ) at puberty, assessed from the current response to two 10 mV steps ( $-60$  to  $-40$  mV). This effect was prevented with pre-application of the GABA<sub>A</sub> receptor blocker gabazine (120  $\mu$ M, Pub + GBZ) and was not seen in slices from  $\delta^{-/-}$  mice, suggesting that the change in input resistance was mediated by  $\delta$ -containing GABA<sub>A</sub> receptors. In contrast, THP decreased input resistance, when assessed before puberty (Pre-pub). Similar steroid-induced increases in input resistance were produced after THP withdrawal (THP Wd). In addition, administration of replacement THP to prevent the decline in THP occurring at puberty (Pub + repl THP) prevented the steroid-induced change in input resistance. ( $n = 8 - 10$  cells for each group, \* $P < 0.05$  vs. pre-THP values; \*\* $P < 0.05$  vs. Pre-pub).
