# Supplementary material for: Reversal of neurosteroid effects at α4β2δ GABAA receptors triggers anxiety at puberty
Source: Springer Nature journal article supplement (doi:10.1038/nn1868), 2007-03-11
Supplement: nn1868-S13.pdf [file nn1868-S13.pdf]

Table 9. Tukey's post-hoc comparisons

| Group        | Comparison         | P       |
|--------------|--------------------|---------|
| Pre-pubertal | Pubertal           | <0.001* |
|              | THP Wd             | <0.001* |
| Pubertal     | Pub + gabazine     | .008*   |
|              | Pub $\delta^{-/-}$ | <0.001* |
|              | Pub + repl THP     | <0.001* |
