# Supplementary material for: Reversal of neurosteroid effects at α4β2δ GABAA receptors triggers anxiety at puberty
Source: Springer Nature journal article supplement (doi:10.1038/nn1868), 2007-03-11
Supplement: nn1868-S19.pdf [file nn1868-S19.pdf]

Table 15. Least Significant Difference planned post-hoc comparisons\*

| Group        | Comparison                    | P            |
|--------------|-------------------------------|--------------|
| Pre-pubertal | Pubertal                      | .000148*     |
|              | 3 $\beta$ -THP - Pre-pubertal | .029*        |
|              | Pre-pubertal - $\delta^{-/-}$ | .045*        |
|              | Pubertal - THP                | .0000206*    |
| Pubertal     | Pre-pubertal                  | .000148*     |
|              | 3 $\beta$ -THP - Pre-pubertal | .0119*       |
|              | 3 $\beta$ -THP - Pubertal     | .0196*       |
|              | Adult                         | .0000526*    |
|              | Pubertal - finasteride        | .042*        |
|              | Pre-pubertal - THP            | .0000000675* |

\*Similar results obtained with Duncan's test. These results were based on percentage changes induced by stress. Similar statistical results were obtained when absolute values of open arm time were compared across groups.
